# Supplementary material for: Molecular characterization of ‘Candidatus Borrelia tachyglossi’ (family Spirochaetaceae) in echidna ticks, Bothriocroton concolor
Source: PubMed Central journal article supplement (PMC5817193; doi:10.1099/ijsem.0.001929), 2017-05-05
Supplement: ijsem-67-1075-s001.pdf [file ijsem-67-1075-s001.pdf]

**Molecular characterisation of ‘*Candidatus Borrelia tachyglossi*’ (family Spirochaetaceae) in echidna ticks, *Bothriocroton concolor***

Supplementary Materials

*The International Journal of Systematic and Evolutionary Microbiology*

**Siew-May Loh<sup>1</sup>, Amber Gillett<sup>2</sup>, Una Ryan<sup>1</sup>, Peter Irwin<sup>1</sup>, Charlotte Oskam<sup>1\*</sup>**

<sup>1</sup>Vector and Water-Borne Pathogen Research Group, School of Veterinary and Life Sciences, Murdoch University, Perth, Western Australia, Australia

<sup>2</sup>Australia Zoo Wildlife Hospital, Beerwah, Queensland, Australia

\*Corresponding Author: [c.oskam@murdoch.edu.au](mailto:c.oskam@murdoch.edu.au)

**Supplementary Table 1.** Primers used for the amplification and sequencing of *flaB*, *glpQ*, *groEL*, and *gyrB* gene sequences.

| Gene                                | Forward primer (5'-3')    | Reverse primer (5'-3')    | Annealing temperature (°C) | Expected size (bp) | References      |
|-------------------------------------|---------------------------|---------------------------|----------------------------|--------------------|-----------------|
| <i>flaB</i> fragment 1 (Primary)    | TCTGATGATGCTGCTGGTATGG    | CAATCGCCTCATCCTGAT        | 50                         | 439                | This study      |
| <i>flaB</i> fragment 1 (Secondary)  | TCTGATGATGCTGCTGGTATGG    | GAAGCTTGCGCACCAGTTAG      | 57                         | 392                | This study      |
| <i>flaB</i> fragment 2 (Primary)    | CTGAAGAGCTTGGAATGCAAC     | AGGTACTTGATTGCTTGTGC      | 52                         | 545                | [1]             |
| <i>flaB</i> fragment 2 (Secondary)  | CTGAAGAGCTTGGAATGCAAC     | GCAATCATAGCCATTGCAGATTGT  | 52                         | 526                | [1, 2]          |
| <i>glpQ</i> fragment 1 (Primary)    | CATTAATTATAGCTCACAGAG     | AACAAGCATTATCAATTTTCC     | 48                         | 599                | [1]             |
| <i>glpQ</i> fragment 1 (Secondary)  | AGTGGATATTTACCAGAACA      | AACAAGCATTATCAATTTTCC     | 48                         | 573                | This study; [1] |
| <i>glpQ</i> fragment 2 (Primary)    | GCACGACCCAGAAATTGACAC     | GTTGCYCCYCCRCCAACAT       | 57                         | 894                | This study      |
| <i>glpQ</i> fragment 2 (Secondary)  | CTGGCATAAGCAACAAGGCA      | GTTGCYCCYCCRCCAACAT       | 57                         | 603                | This study      |
| <i>groEL</i> fragment 1 (Primary)   | TGGCTAAGGACATATATTTTA     | GCTCCAACATTAATAACAGC      | 48                         | 1,141              | This study; [1] |
| <i>groEL</i> fragment 1 (Secondary) | GATGCKAGAAAGAGYYTGCT      | GCTCCAACATTAATAACAGC      | 48                         | 1,115              | This study      |
| <i>groEL</i> fragment 2 (Primary)   | ATTGCTATACTTACTGGAGG      | TTACATCATTCCCATTCCAG      | 48                         | 768                | [1]             |
| <i>groEL</i> fragment 2 (Secondary) | GGTGTGCTTATTAGTGAGGA      | TTACATCATTCCCATTCCAG      | 50                         | 750                | This study; [1] |
| <i>gyrB</i> fragment 1 (Primary)    | ATTGAYGARGCYTTRGCRGG      | GACCACTCCTGAAACCAGCA      | 57                         | 727                | This study      |
| <i>gyrB</i> fragment 1 (Secondary)  | ATTGAYGARGCYTTRGCRGG      | CYTCYGTCCAYTTAAGTCCA      | 51                         | 643                | This study      |
| <i>gyrB</i> fragment 2 (Primary)    | CAARGAGRCTTAGRGAACCTGC    | CCATCAACATCAGCATCAGC      | 57                         | 949                | This study; [3] |
| <i>gyrB</i> fragment 2 (Secondary)  | CAARGAGRCTTAGRGAACCTGC    | CCAACACCAGCWCCAAGAGA      | 57                         | 880                | This study      |
| <i>gyrB</i> fragment 3 (Primary)    | CTTTGGGAAACTACTATGAAYCCTG | ACATCCAGATTTACTACATCAAGYG | 51                         | 764                | This study      |
| <i>gyrB</i> fragment 3 (Secondary)  | CTTTGGGAAACTACTATGAAYCCTG | GTTCAACWTCATCYCCCAT       | 51                         | 713                | This study      |

**Supplementary Table 2.** Genetic distance matrix of partial *flaB* gene sequences showing percentage nucleotide identities between ‘*Candidatus* *Borrelia* tachyglossi’ genotypes A, B, and C, other *Borrelia* species, and the outgroup, *Brachyspira pilosicoli*.

|                                                                               | 1    | 2    | 3    | 4    | 5    | 6    | 7    | 8    | 9    | 10   | 11   | 12   | 13   | 14   | 15   | 16   | 17   |
|-------------------------------------------------------------------------------|------|------|------|------|------|------|------|------|------|------|------|------|------|------|------|------|------|
| <b>1. <i>Candidatus</i> <i>Borrelia</i> tachyglossi genotype B (KY586964)</b> |      |      |      |      |      |      |      |      |      |      |      |      |      |      |      |      |      |
| <b>2. <i>Candidatus</i> <i>Borrelia</i> tachyglossi genotype C (KY586965)</b> | 99.9 |      |      |      |      |      |      |      |      |      |      |      |      |      |      |      |      |
| <b>3. <i>Candidatus</i> <i>Borrelia</i> tachyglossi genotype A (KY586966)</b> | 99.6 | 99.7 |      |      |      |      |      |      |      |      |      |      |      |      |      |      |      |
| <b>4. <i>Borrelia turcica</i> IST7 (KF422815)</b>                             | 88.0 | 87.9 | 87.9 |      |      |      |      |      |      |      |      |      |      |      |      |      |      |
| <b>5. <i>Borrelia anserina</i> BA2 (CP005829)</b>                             | 85.9 | 86.0 | 85.8 | 87.2 |      |      |      |      |      |      |      |      |      |      |      |      |      |
| <b>6. <i>Borrelia hermsii</i> (NC_010673)</b>                                 | 84.7 | 84.8 | 84.6 | 86.7 | 92.9 |      |      |      |      |      |      |      |      |      |      |      |      |
| <b>7. <i>Borrelia parkeri</i> (CP007022)</b>                                  | 84.6 | 84.7 | 84.5 | 87.3 | 93.2 | 93.3 |      |      |      |      |      |      |      |      |      |      |      |
| <b>8. <i>Borrelia miyamotoi</i> (CP006647)</b>                                | 82.3 | 82.4 | 82.3 | 85.1 | 91.9 | 91.1 | 91.7 |      |      |      |      |      |      |      |      |      |      |
| <b>9. <i>Borrelia crocidurae</i> (CP003426)</b>                               | 83.3 | 83.2 | 83.2 | 86.1 | 90.1 | 89.0 | 90.3 | 89.0 |      |      |      |      |      |      |      |      |      |
| <b>10. <i>Borrelia duttonii</i> Ly (CP000976)</b>                             | 82.8 | 82.6 | 82.6 | 85.8 | 90.1 | 88.8 | 90.3 | 89.0 | 98.8 |      |      |      |      |      |      |      |      |
| <b>11. <i>Borrelia recurrentis</i> (CP000993)</b>                             | 82.6 | 82.5 | 82.5 | 85.8 | 90.1 | 88.8 | 90.3 | 89.0 | 98.8 | 99.7 |      |      |      |      |      |      |      |
| <b>12. <i>Borrelia hispanica</i> (U28498)</b>                                 | 80.0 | 79.9 | 79.9 | 82.3 | 87.1 | 85.3 | 86.7 | 85.2 | 93.1 | 93.9 | 93.8 |      |      |      |      |      |      |
| <b>13. <i>Borrelia afzelii</i> Tom3107 (CP009212)</b>                         | 83.2 | 83.1 | 82.8 | 85.6 | 85.5 | 84.1 | 84.2 | 82.8 | 84.1 | 83.5 | 83.5 | 81.3 |      |      |      |      |      |
| <b>14. <i>Borrelia garinii</i> (CP003151)</b>                                 | 83.0 | 82.8 | 82.6 | 85.3 | 84.5 | 83.3 | 84.1 | 81.7 | 83.2 | 82.6 | 82.6 | 80.0 | 94.7 |      |      |      |      |
| <b>15. <i>Borrelia valaisiana</i> (CP009117)</b>                              | 82.7 | 82.6 | 82.3 | 86.2 | 84.6 | 84.1 | 84.5 | 83.0 | 83.9 | 83.7 | 83.7 | 81.2 | 95.7 | 95.2 |      |      |      |
| <b>16. <i>Borrelia chilensis</i> (CP009910)</b>                               | 83.1 | 83.0 | 82.7 | 86.0 | 84.7 | 83.7 | 84.3 | 83.0 | 83.7 | 83.5 | 83.3 | 81.4 | 95.1 | 93.8 | 94.9 |      |      |
| <b>17. <i>Borrelia burgdorferi</i> B31 (AE000783)</b>                         | 82.4 | 82.3 | 82.1 | 85.7 | 84.3 | 83.3 | 83.7 | 82.0 | 83.7 | 83.5 | 83.4 | 81.4 | 94.4 | 93.6 | 94.7 | 94.9 |      |
| <b>18. <i>Brachyspira pilosicoli</i> (AY241832)</b>                           | 46.5 | 46.7 | 46.7 | 46.8 | 47.8 | 47.3 | 47.2 | 47.0 | 46.7 | 46.6 | 46.5 | 45.8 | 46.3 | 47.4 | 46.9 | 47.4 | 47.2 |

**Supplementary Table 3.** Genetic distance matrix of partial *glpQ* gene sequences showing percentage nucleotide identities between ‘*Candidatus* *Borrelia* tachyglossi’ genotypes A, B, and C, other *Borrelia* species, and the outgroup, *Escherichia coli*.

|                                                                               | 1    | 2    | 3    | 4    | 5    | 6    | 7    | 8    | 9    | 10   | 11   | 12   | 13   | 14   | 15   | 16 | 17   | 18   |
|-------------------------------------------------------------------------------|------|------|------|------|------|------|------|------|------|------|------|------|------|------|------|----|------|------|
| <b>1. <i>Candidatus</i> <i>Borrelia</i> tachyglossi genotype B (KY586967)</b> |      |      |      |      |      |      |      |      |      |      |      |      |      |      |      |    |      |      |
| <b>2. <i>Candidatus</i> <i>Borrelia</i> tachyglossi genotype A (KY586968)</b> | 98.6 |      |      |      |      |      |      |      |      |      |      |      |      |      |      |    |      |      |
| <b>3. <i>Borrelia</i> sp. tAG17M (AB529398)</b>                               | 84.3 | 84.4 |      |      |      |      |      |      |      |      |      |      |      |      |      |    |      |      |
| <b>4. <i>Borrelia</i> sp. tAG88 (AB529404)</b>                                | 84.4 | 84.8 | 99.7 |      |      |      |      |      |      |      |      |      |      |      |      |    |      |      |
| <b>5. <i>Borrelia</i> sp. tAG66M (AB529402)</b>                               | 84.1 | 84.4 | 99.2 | 99.5 |      |      |      |      |      |      |      |      |      |      |      |    |      |      |
| <b>6. <i>Borrelia</i> sp. tAG85 (AB529403)</b>                                | 84.3 | 84.7 | 99.2 | 99.5 | 99.1 |      |      |      |      |      |      |      |      |      |      |    |      |      |
| <b>7. <i>Borrelia turcica</i> (AB529430)</b>                                  | 84.1 | 84.2 | 95.5 | 95.4 | 95.0 | 95.0 |      |      |      |      |      |      |      |      |      |    |      |      |
| <b>8. <i>Borrelia</i> sp. Tortoise14H1 (AB529431)</b>                         | 85.4 | 85.7 | 94.1 | 94.2 | 93.7 | 93.7 | 93.6 |      |      |      |      |      |      |      |      |    |      |      |
| <b>9. <i>Borrelia</i> sp. Tick98M (AB529432)</b>                              | 83.9 | 84.0 | 86.5 | 86.3 | 85.9 | 86.3 | 85.6 | 86.6 |      |      |      |      |      |      |      |    |      |      |
| <b>10. <i>Borrelia anserina</i> BA2 (CP005829)</b>                            | 83.8 | 83.8 | 83.2 | 83.3 | 83.1 | 83.3 | 84.4 | 83.6 | 82.0 |      |      |      |      |      |      |    |      |      |
| <b>11. <i>Borrelia coriaceae</i> Co53 (CP005745)</b>                          | 84.1 | 84.8 | 83.0 | 83.0 | 82.7 | 82.8 | 83.3 | 83.1 | 82.8 | 87.6 |      |      |      |      |      |    |      |      |
| <b>12. <i>Borrelia parkeri</i> (CP007022)</b>                                 | 84.6 | 84.6 | 82.4 | 82.3 | 82.0 | 82.3 | 84.1 | 83.0 | 83.3 | 89.6 | 89.2 |      |      |      |      |    |      |      |
| <b>13. <i>Borrelia hermsii</i> (CP005680)</b>                                 | 84.1 | 84.3 | 83.0 | 82.8 | 82.8 | 82.7 | 84.4 | 83.0 | 83.5 | 88.3 | 87.9 | 90.3 |      |      |      |    |      |      |
| <b>14. <i>Borrelia miyamotoi</i> (CP006647)</b>                               | 83.1 | 82.8 | 83.1 | 82.7 | 82.5 | 82.7 | 83.3 | 82.7 | 83.2 | 87.0 | 86.7 | 87.9 | 88.2 |      |      |    |      |      |
| <b>15. <i>Borrelia theileri</i> (KF569938)</b>                                | 80.5 | 80.8 | 82.2 | 81.8 | 81.6 | 81.8 | 81.8 | 80.8 | 81.7 | 84.4 | 85.4 | 85.0 | 85.9 | 90.6 |      |    |      |      |
| <b>16. <i>Borrelia crocidurae</i> (CP003426)</b>                              | 80.8 | 80.9 | 80.4 | 80.5 | 80.3 | 80.5 | 80.5 | 80.7 | 81.1 | 84.4 | 84.6 | 84.6 | 84.8 | 83.2 | 82.6 |    |      |      |
| <b>17. <i>Borrelia duttonii</i> Ly (CP000976)</b>                             | 80.7 | 81.0 | 80.3 | 80.4 | 80.2 | 80.2 | 80.4 | 81.0 | 80.9 | 84.1 | 84.9 | 84.4 | 85.0 | 83.2 | 82.0 | 97 |      |      |
| <b>18. <i>Borrelia recurrentis</i> (CP000993)</b>                             | 80.5 | 80.9 | 80.2 | 80.3 | 80.1 | 80.1 | 80.3 | 80.9 | 81.0 | 84.0 | 85.0 | 84.6 | 85.1 | 83.1 | 82.2 | 97 | 99.7 |      |
| <b>19. <i>Escherichia coli</i> (X56907)</b>                                   | 54.0 | 54.1 | 55.2 | 55.3 | 55.1 | 55.3 | 55.8 | 54.5 | 54.9 | 56.4 | 56.3 | 56.2 | 54.9 | 55.4 | 55.8 | 54 | 54.5 | 54.4 |

**Supplementary Table 4.** Genetic distance matrix of partial *groEL* gene sequences showing percentage nucleotide identities between ‘*Candidatus* *Borrelia* tachyglossi’ genotypes A, B, and C, other *Borrelia* species, and the outgroup, *Treponema pallidum*.

|                                                                               | 1    | 2    | 3    | 4    | 5    | 6    | 7    | 8    | 9    | 10   | 11   | 12   | 13   | 14   | 15   | 16   |
|-------------------------------------------------------------------------------|------|------|------|------|------|------|------|------|------|------|------|------|------|------|------|------|
| <b>1. <i>Candidatus</i> <i>Borrelia</i> tachyglossi genotype B (KY586969)</b> |      |      |      |      |      |      |      |      |      |      |      |      |      |      |      |      |
| <b>2. <i>Candidatus</i> <i>Borrelia</i> tachyglossi genotype A (KY586971)</b> | 100  |      |      |      |      |      |      |      |      |      |      |      |      |      |      |      |
| <b>3. <i>Candidatus</i> <i>Borrelia</i> tachyglossi genotype C (KY586970)</b> | 99.9 | 99.9 |      |      |      |      |      |      |      |      |      |      |      |      |      |      |
| <b>4. <i>Borrelia</i> anserina (CP005829)</b>                                 | 88.9 | 88.9 | 89.0 |      |      |      |      |      |      |      |      |      |      |      |      |      |
| <b>5. <i>Borrelia</i> miyamotoi (CP006647)</b>                                | 88.8 | 88.8 | 88.9 | 91.6 |      |      |      |      |      |      |      |      |      |      |      |      |
| <b>6. <i>Borrelia</i> parkeri (CP007022)</b>                                  | 89.0 | 89.0 | 89.1 | 92.8 | 92.9 |      |      |      |      |      |      |      |      |      |      |      |
| <b>7. <i>Borrelia</i> hermsii (NC_010673)</b>                                 | 89.3 | 89.3 | 89.4 | 92.9 | 92.5 | 94.3 |      |      |      |      |      |      |      |      |      |      |
| <b>8. <i>Borrelia</i> crocidurae (CP003426)</b>                               | 88.2 | 88.2 | 88.3 | 91.9 | 91.8 | 91.9 | 92.2 |      |      |      |      |      |      |      |      |      |
| <b>9. <i>Borrelia</i> duttonii Ly (CP000976)</b>                              | 87.9 | 87.9 | 88.0 | 91.9 | 91.5 | 91.7 | 91.9 | 99.2 |      |      |      |      |      |      |      |      |
| <b>10. <i>Borrelia</i> recurrentis (CP000993)</b>                             | 88.0 | 88.0 | 88.2 | 92.0 | 91.7 | 91.9 | 91.9 | 99.3 | 99.6 |      |      |      |      |      |      |      |
| <b>11. <i>Borrelia</i> hispanica (GU357581)</b>                               | 87.6 | 87.6 | 87.8 | 91.6 | 91.1 | 91.7 | 91.6 | 98.2 | 98.0 | 98.0 |      |      |      |      |      |      |
| <b>12. <i>Borrelia</i> afzelii Tom3107 (CP009212)</b>                         | 84.3 | 84.3 | 84.3 | 84.4 | 85.6 | 84.9 | 85.2 | 84.7 | 84.8 | 84.9 | 84.5 |      |      |      |      |      |
| <b>13. <i>Borrelia</i> garinii (CP003151)</b>                                 | 83.9 | 83.9 | 83.9 | 84.3 | 85.2 | 84.8 | 84.4 | 84.3 | 84.5 | 84.6 | 84.2 | 96.2 |      |      |      |      |
| <b>14. <i>Borrelia</i> valaisiana (CP009117)</b>                              | 84.0 | 84.0 | 83.9 | 84.3 | 85.4 | 84.6 | 84.8 | 84.4 | 84.5 | 84.6 | 84.3 | 96.1 | 95.7 |      |      |      |
| <b>15. <i>Borrelia</i> burgdorferi B31 (AE000783)</b>                         | 84.3 | 84.3 | 84.3 | 84.4 | 85.4 | 85.0 | 84.8 | 84.5 | 84.6 | 84.7 | 84.1 | 95.8 | 95.6 | 94.5 |      |      |
| <b>16. <i>Borrelia</i> chilensis VA1 (CP009910)</b>                           | 85.0 | 85.0 | 84.9 | 84.3 | 85.1 | 85.0 | 84.7 | 84.5 | 84.5 | 84.6 | 84.5 | 93.4 | 92.8 | 93.3 | 93.6 |      |
| <b>17. <i>Treponema</i> pallidum (NZ_CP010566)</b>                            | 63.7 | 63.7 | 63.7 | 62.5 | 61.6 | 62.1 | 62.1 | 62.6 | 62.7 | 62.7 | 62.1 | 62.7 | 62.4 | 62.7 | 62.4 | 63.2 |

**Supplementary Table 5.** Genetic distance matrix of partial *gyrB* gene sequences showing percentage nucleotide identities between ‘*Candidatus* *Borrelia* tachyglossi’ genotypes A, B, and C, other *Borrelia* species, and the outgroup, *Spirochaeta lutea*.

|                                                                               | 1    | 2    | 3    | 4    | 5    | 6    | 7    | 8    | 9    | 10   | 11   | 12   | 13   | 14   | 15   | 16   |
|-------------------------------------------------------------------------------|------|------|------|------|------|------|------|------|------|------|------|------|------|------|------|------|
| <b>1. <i>Candidatus</i> <i>Borrelia</i> tachyglossi genotype B (KY586972)</b> |      |      |      |      |      |      |      |      |      |      |      |      |      |      |      |      |
| <b>2. <i>Candidatus</i> <i>Borrelia</i> tachyglossi genotype A (KY586974)</b> | 99.9 |      |      |      |      |      |      |      |      |      |      |      |      |      |      |      |
| <b>3. <i>Candidatus</i> <i>Borrelia</i> tachyglossi genotype C (KY586973)</b> | 99.6 | 99.7 |      |      |      |      |      |      |      |      |      |      |      |      |      |      |
| <b>4. <i>Borrelia</i> anserina BA2 (CP005829)</b>                             | 86.0 | 86.1 | 86.1 |      |      |      |      |      |      |      |      |      |      |      |      |      |
| <b>5. <i>Borrelia</i> parkeri (CP007022)</b>                                  | 86.9 | 87.0 | 86.8 | 91.1 |      |      |      |      |      |      |      |      |      |      |      |      |
| <b>6. <i>Borrelia</i> hermsii (NC_010673)</b>                                 | 88.1 | 88.2 | 88.2 | 90.7 | 92.8 |      |      |      |      |      |      |      |      |      |      |      |
| <b>7. <i>Borrelia</i> miyamotoi (CP006647)</b>                                | 86.8 | 87.0 | 86.9 | 88.1 | 89.0 | 90.0 |      |      |      |      |      |      |      |      |      |      |
| <b>8. <i>Borrelia</i> crocidurae (CP003426)</b>                               | 85.3 | 85.4 | 85.1 | 86.7 | 87.3 | 88.3 | 86.7 |      |      |      |      |      |      |      |      |      |
| <b>9. <i>Borrelia</i> duttonii Ly (CP000976)</b>                              | 85.4 | 85.4 | 85.2 | 86.7 | 87.4 | 88.4 | 86.6 | 99.6 |      |      |      |      |      |      |      |      |
| <b>10. <i>Borrelia</i> recurrentis (CP000993)</b>                             | 85.0 | 85.1 | 84.8 | 86.5 | 87.3 | 88.3 | 86.4 | 99.3 | 99.5 |      |      |      |      |      |      |      |
| <b>11. <i>Borrelia</i> turcica IST7 (AB473535)</b>                            | 87.9 | 88.0 | 87.8 | 85.0 | 86.4 | 86.7 | 86.2 | 85.7 | 85.6 | 85.4 |      |      |      |      |      |      |
| <b>12. <i>Borrelia</i> afzelii Pko (CP002933)</b>                             | 80.8 | 81.0 | 80.8 | 79.6 | 80.8 | 79.7 | 80.3 | 79.8 | 79.8 | 79.7 | 80.8 |      |      |      |      |      |
| <b>13. <i>Borrelia</i> garinii (CP003151)</b>                                 | 81.2 | 81.3 | 81.2 | 79.4 | 80.8 | 80.1 | 79.6 | 80.2 | 80.3 | 80.1 | 80.5 | 94.4 |      |      |      |      |
| <b>14. <i>Borrelia</i> valaisiana (CP009117)</b>                              | 81.3 | 81.4 | 81.3 | 80.0 | 80.9 | 80.2 | 80.5 | 80.1 | 80.3 | 80.1 | 80.7 | 94.4 | 93.5 |      |      |      |
| <b>15. <i>Borrelia</i> burgdorferi B31 (AE000783)</b>                         | 80.8 | 80.9 | 80.8 | 79.4 | 80.7 | 80.0 | 79.8 | 80.3 | 80.4 | 80.3 | 80.9 | 93.9 | 93.9 | 93.6 |      |      |
| <b>16. <i>Borrelia</i> chilensis VA1 (CP009910)</b>                           | 81.9 | 82.0 | 82.0 | 80.1 | 81.6 | 81.2 | 80.6 | 81.0 | 80.9 | 80.7 | 80.7 | 92.9 | 92.9 | 92.7 | 92.7 |      |
| <b>17. <i>Spirochaeta</i> lutea (JNUP01000064)</b>                            | 59.3 | 59.4 | 59.3 | 57.8 | 59.1 | 58.8 | 58.2 | 58.7 | 58.6 | 58.6 | 59.7 | 58.3 | 58.6 | 58.5 | 58.5 | 58.1 |

**Supplementary Table 6.** Genetic distance matrix of concatenated 16S, *flaB*, and *gyrB* gene sequences showing percentage nucleotide identities between ‘*Candidatus* *Borrelia* *tachyglossi*’ genotypes A, B, and C, other *Borrelia* species, and the outgroup, *Spirochaeta* *lutea*.

|                                                                           | 1    | 2    | 3    | 4    | 5    | 6    | 7    | 8    | 9    | 10   | 11   | 12   | 13   | 14   | 15   | 16   |
|---------------------------------------------------------------------------|------|------|------|------|------|------|------|------|------|------|------|------|------|------|------|------|
| <b>1. <i>Candidatus</i> <i>Borrelia</i> <i>tachyglossi</i> genotype B</b> |      |      |      |      |      |      |      |      |      |      |      |      |      |      |      |      |
| <b>2. <i>Candidatus</i> <i>Borrelia</i> <i>tachyglossi</i> genotype A</b> | 99.8 |      |      |      |      |      |      |      |      |      |      |      |      |      |      |      |
| <b>3. <i>Candidatus</i> <i>Borrelia</i> <i>tachyglossi</i> genotype C</b> | 99.7 | 99.8 |      |      |      |      |      |      |      |      |      |      |      |      |      |      |
| <b>4. <i>Borrelia</i> <i>turcica</i></b>                                  | 91.2 | 91.2 | 91.1 |      |      |      |      |      |      |      |      |      |      |      |      |      |
| <b>5. <i>Borrelia</i> <i>anserina</i></b>                                 | 89.6 | 89.6 | 89.6 | 89.3 |      |      |      |      |      |      |      |      |      |      |      |      |
| <b>6. <i>Borrelia</i> <i>hermsii</i></b>                                  | 90.7 | 90.8 | 90.8 | 90.2 | 93.6 |      |      |      |      |      |      |      |      |      |      |      |
| <b>7. <i>Borrelia</i> <i>parkeri</i></b>                                  | 89.9 | 90.0 | 89.9 | 90.1 | 93.9 | 94.9 |      |      |      |      |      |      |      |      |      |      |
| <b>8. <i>Borrelia</i> <i>miyamotoi</i></b>                                | 89.2 | 89.3 | 89.3 | 89.3 | 91.9 | 92.8 | 92.4 |      |      |      |      |      |      |      |      |      |
| <b>9. <i>Borrelia</i> <i>crocidurae</i></b>                               | 88.8 | 88.9 | 88.7 | 89.6 | 90.8 | 91.6 | 91.4 | 90.5 |      |      |      |      |      |      |      |      |
| <b>10. <i>Borrelia</i> <i>duttonii</i></b>                                | 88.7 | 88.8 | 88.6 | 89.4 | 90.8 | 91.6 | 91.4 | 90.4 | 99.6 |      |      |      |      |      |      |      |
| <b>11. <i>Borrelia</i> <i>recurrentis</i></b>                             | 88.5 | 88.5 | 88.4 | 89.3 | 90.7 | 91.4 | 91.3 | 90.3 | 99.3 | 99.6 |      |      |      |      |      |      |
| <b>12. <i>Borrelia</i> <i>afzelii</i></b>                                 | 86.0 | 86.0 | 86.0 | 86.7 | 86.0 | 85.7 | 86.4 | 85.6 | 85.7 | 85.6 | 85.4 |      |      |      |      |      |
| <b>13. <i>Borrelia</i> <i>valaisiana</i></b>                              | 86.2 | 86.2 | 86.2 | 86.8 | 85.9 | 86.0 | 86.5 | 85.7 | 85.8 | 85.8 | 85.7 | 96.2 |      |      |      |      |
| <b>14. <i>Borrelia</i> <i>garinii</i></b>                                 | 86.2 | 86.2 | 86.2 | 86.4 | 85.5 | 85.8 | 86.3 | 85.1 | 85.6 | 85.6 | 85.4 | 95.8 | 95.5 |      |      |      |
| <b>15. <i>Borrelia</i> <i>burgdorferi</i></b>                             | 85.8 | 85.8 | 85.9 | 86.8 | 85.6 | 85.8 | 86.3 | 85.1 | 85.9 | 86.0 | 85.8 | 95.6 | 95.5 | 95.5 |      |      |
| <b>16. <i>Borrelia</i> <i>chilensis</i></b>                               | 86.7 | 86.7 | 86.7 | 86.9 | 86.2 | 86.6 | 87.0 | 85.9 | 86.3 | 86.3 | 86.0 | 95.2 | 95.1 | 94.9 | 95.1 |      |
| <b>17. <i>Spirochaeta</i> <i>lutea</i></b>                                | 63.1 | 63.2 | 63.1 | 63.1 | 62.0 | 62.8 | 62.8 | 62.1 | 62.6 | 62.5 | 62.4 | 62.4 | 62.7 | 62.5 | 62.7 | 62.6 |

**Supplementary Table 7.** Genetic distance matrix of concatenated 16S, *flaB*, *groEL*, and *gyrB* gene sequences showing percentage nucleotide identities between ‘*Candidatus* *Borrelia* tachyglossi’ genotypes A, B, and C, other *Borrelia* species, and the outgroup, *Spirochaeta lutea*.

|                                                                    | 1    | 2    | 3    | 4    | 5    | 6    | 7    | 8    | 9    | 10   | 11   | 12   | 13   | 14   | 15   |
|--------------------------------------------------------------------|------|------|------|------|------|------|------|------|------|------|------|------|------|------|------|
| <b>1. <i>Candidatus</i> <i>Borrelia</i> tachyglossi genotype B</b> |      |      |      |      |      |      |      |      |      |      |      |      |      |      |      |
| <b>2. <i>Candidatus</i> <i>Borrelia</i> tachyglossi genotype C</b> | 99.8 |      |      |      |      |      |      |      |      |      |      |      |      |      |      |
| <b>3. <i>Candidatus</i> <i>Borrelia</i> tachyglossi genotype A</b> | 99.9 | 99.8 |      |      |      |      |      |      |      |      |      |      |      |      |      |
| <b>4. <i>Borrelia</i> anserina</b>                                 | 89.4 | 89.4 | 89.4 |      |      |      |      |      |      |      |      |      |      |      |      |
| <b>5. <i>Borrelia</i> hermsii</b>                                  | 90.3 | 90.3 | 90.3 | 93.4 |      |      |      |      |      |      |      |      |      |      |      |
| <b>6. <i>Borrelia</i> parkeri</b>                                  | 89.7 | 89.7 | 89.7 | 93.5 | 94.7 |      |      |      |      |      |      |      |      |      |      |
| <b>7. <i>Borrelia</i> miyamotoi</b>                                | 89.1 | 89.2 | 89.2 | 91.8 | 92.7 | 92.6 |      |      |      |      |      |      |      |      |      |
| <b>8. <i>Borrelia</i> crocidurae</b>                               | 88.6 | 88.6 | 88.6 | 91.1 | 91.8 | 91.6 | 90.9 |      |      |      |      |      |      |      |      |
| <b>9. <i>Borrelia</i> duttonii</b>                                 | 88.5 | 88.4 | 88.5 | 91.1 | 91.7 | 91.5 | 90.8 | 99.5 |      |      |      |      |      |      |      |
| <b>10. <i>Borrelia</i> recurrentis</b>                             | 88.3 | 88.3 | 88.4 | 91.1 | 91.6 | 91.5 | 90.7 | 99.3 | 99.6 |      |      |      |      |      |      |
| <b>11. <i>Borrelia</i> afzelii</b>                                 | 85.5 | 85.5 | 85.5 | 85.5 | 85.6 | 85.9 | 85.6 | 85.4 | 85.4 | 85.3 |      |      |      |      |      |
| <b>12. <i>Borrelia</i> valaisiana</b>                              | 85.5 | 85.5 | 85.5 | 85.5 | 85.7 | 85.9 | 85.6 | 85.4 | 85.4 | 85.3 | 96.2 |      |      |      |      |
| <b>13. <i>Borrelia</i> garinii</b>                                 | 85.5 | 85.5 | 85.5 | 85.1 | 85.4 | 85.8 | 85.1 | 85.2 | 85.2 | 85.1 | 95.9 | 95.6 |      |      |      |
| <b>14. <i>Borrelia</i> burgdorferi</b>                             | 85.4 | 85.4 | 85.4 | 85.2 | 85.5 | 85.9 | 85.2 | 85.5 | 85.6 | 85.5 | 95.7 | 95.2 | 95.6 |      |      |
| <b>15. <i>Borrelia</i> chilensis</b>                               | 86.2 | 86.2 | 86.2 | 85.7 | 86.0 | 86.4 | 85.6 | 85.7 | 85.7 | 85.6 | 94.7 | 94.6 | 94.3 | 94.6 |      |
| <b>16. <i>Spirochaeta</i> lutea</b>                                | 62.9 | 62.9 | 63.0 | 62.2 | 62.6 | 62.5 | 62.0 | 62.6 | 62.5 | 62.4 | 62.5 | 62.7 | 62.5 | 62.7 | 62.7 |



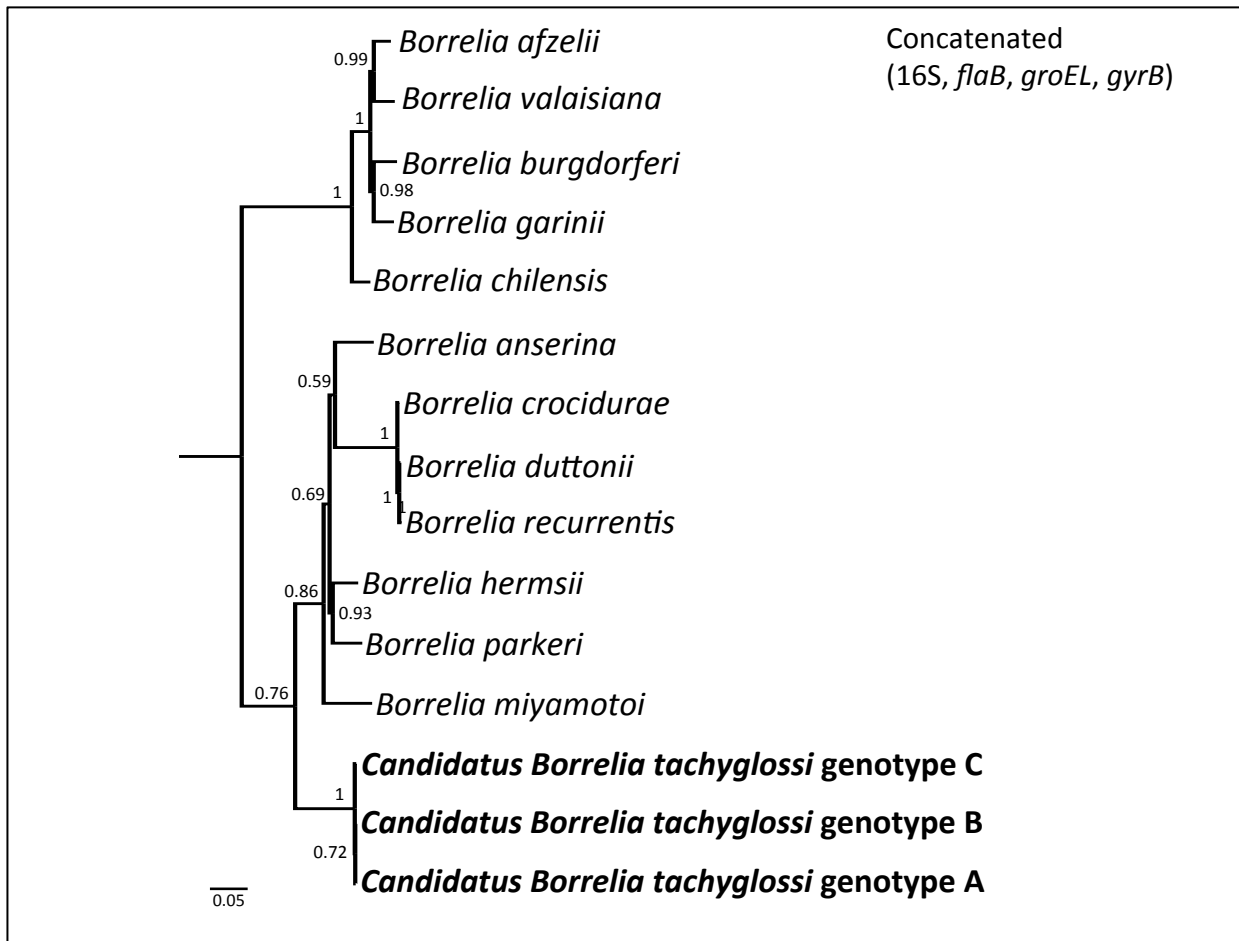

**Supplementary Fig. 1.** Phylogenetic reconstructions of concatenated 16S, *flaB*, *groEL*, and *gyrB* sequences of ‘*Candidatus Borrelia tachyglossi*’ genotypes A, B, and C identified in *B. concolor* ticks from echidnas. *Spirochaeta lutea* was used as outgroup. Sequences in this study are indicated in bold.

## References

1. **Toledo A, Anda P, Escudero R, Larsson C, Bergstrom S *et al.*** Phylogenetic analysis of a virulent *Borrelia* species isolated from patients with relapsing fever. *J Clin Microbiol* 2010; 48: 2484-2489.
2. **Barbour AG, Maupin GO, Teltow GJ, Carter CJ, Piesman J.** Identification of an uncultivable *Borrelia* species in the hard tick *Amblyomma americanum*: possible agent of a Lyme disease-like illness. *J Infect Dis* 1996; 173: 403-409.
3. **Schwan TG, Raffel SJ, Schrumpf ME, Policastro PF, Rawlings JA *et al.*** Phylogenetic Analysis of the Spirochetes *Borrelia parkeri* and *Borrelia turicatae* and the Potential for Tick-Borne Relapsing Fever in Florida. *J Clin Microbiol* 2005; 43: 3851-3859.
